# Supplementary material for: The Landscape of Aberrant Alternative Splicing Events in Steatotic Liver Graft Post Transplantation via Transcriptome-Wide Analysis
Source: MDPI journal article supplement (doi:10.3390/ijms24098216), 2023-05-04
Supplement: s1 [file s1]

## Supplementary figures

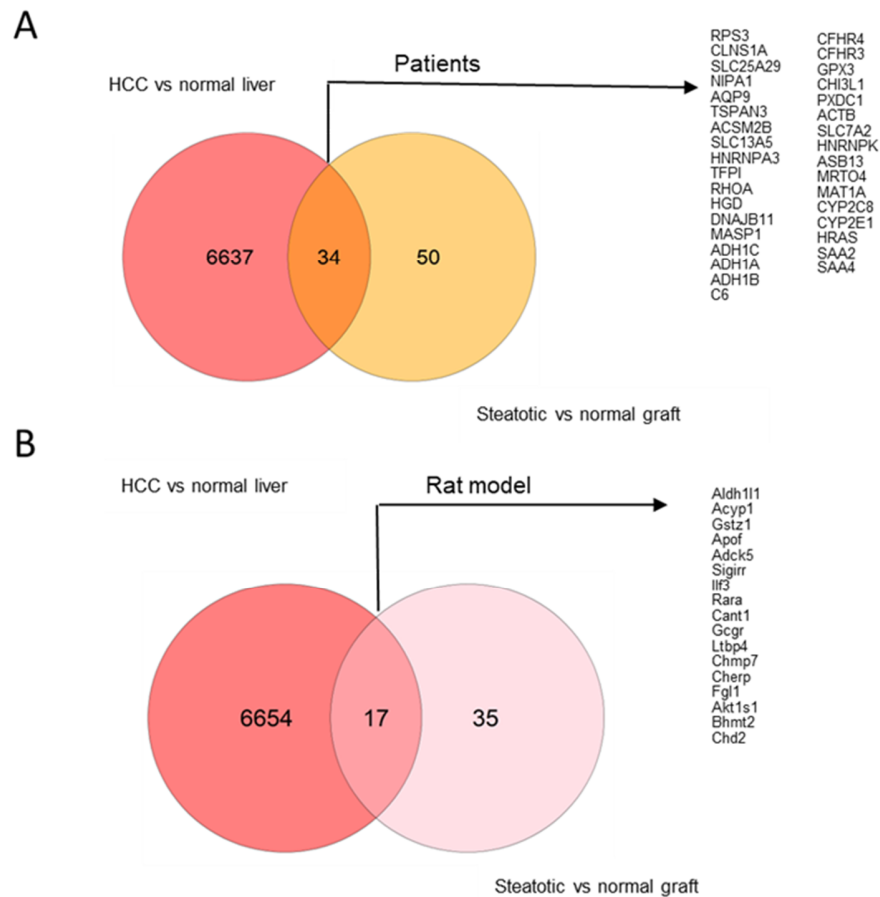

**Figure S1. The overlapped genes involved differential ASEs of steatotic liver graft and HCC.**

**A** Thirty four genes in human were coincided in genes involved differential ASEs between HCC vs normal liver and steatotic vs normal liver graft. **B** Seventeen genes in rat model were found to be overlapped in genes involved differential ASEs between HCC vs normal liver and steatotic vs normal liver graft. ASEs, alternative splicing events.

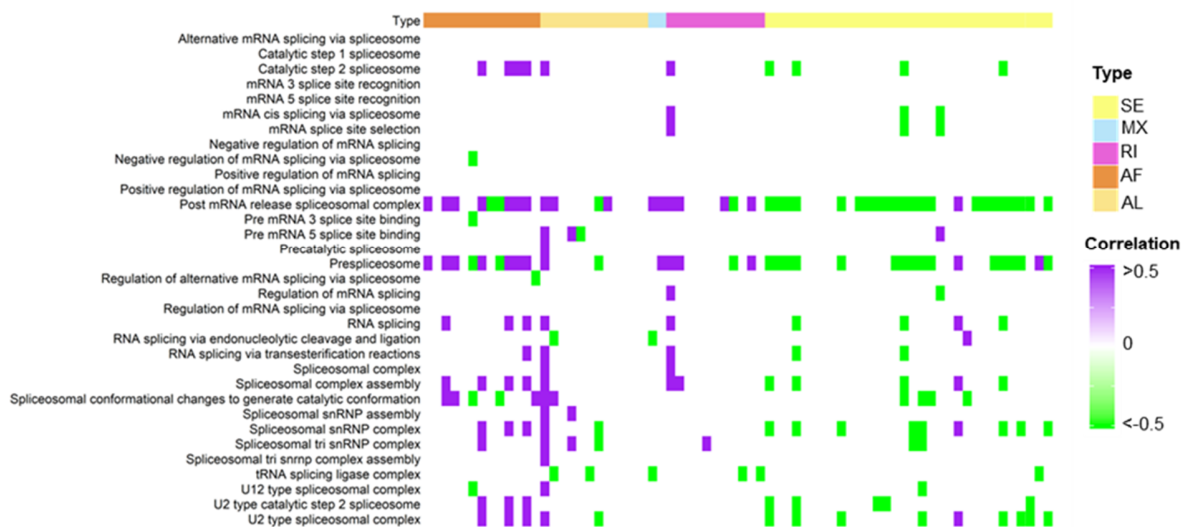

**Figure S2. The differential AEs were associated splicing factors.** The association analysis of splicing factors and differential AEs. AEs, alternative splicing events.

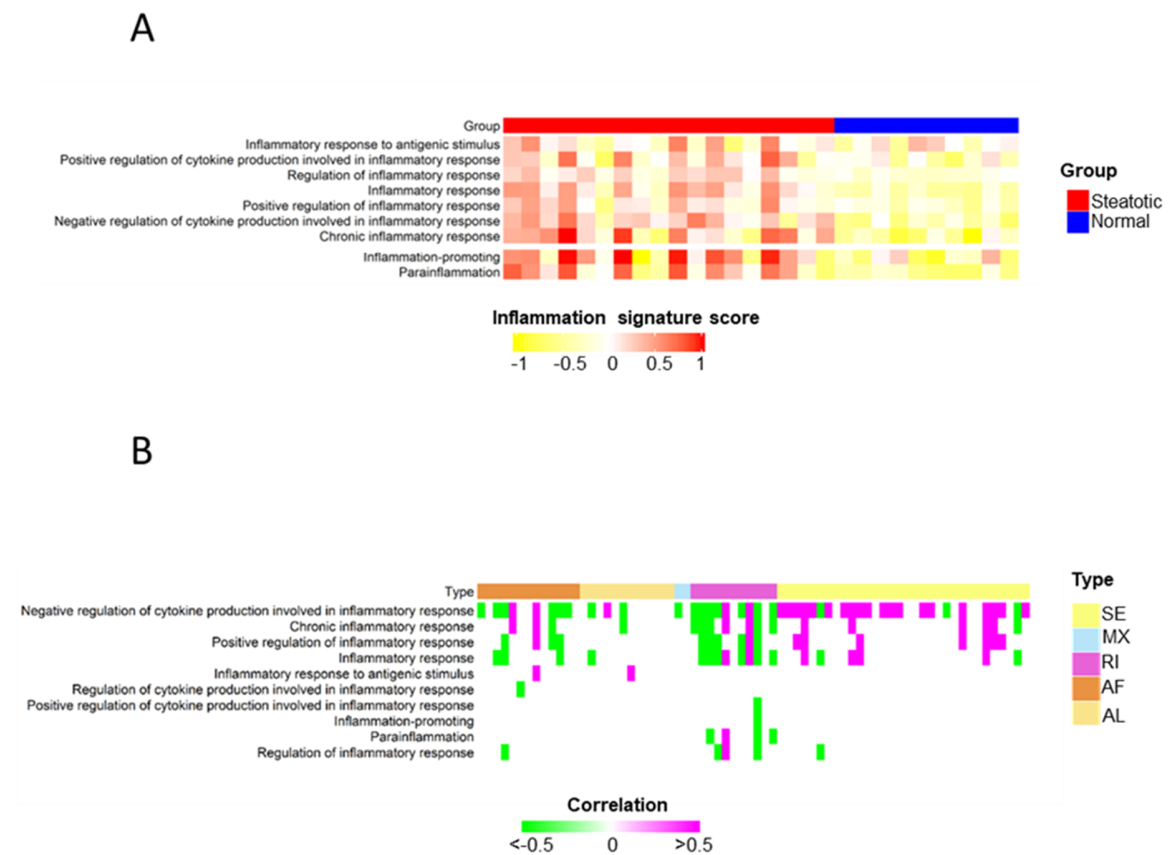

**Figure S3. The severer inflammation in steatotic grafts were affected by differential ASEs.**

**A** The genes of inflammation signature were enriched in human steatotic liver grafts. **B** The inflammation signature was affected differential ASEs. ASEs, alternative splicing events.

## Supplementary table

**Table S1.** Characteristics of the patients post liver transplantation using normal or steatotic graft

|                                           | <b>Normal graft<br/>(N=10)</b> | <b>Steatotic graft<br/>(N=18)</b> |
|-------------------------------------------|--------------------------------|-----------------------------------|
| <b>Age (year)</b>                         | 53.8                           | 54.9                              |
| <b>Gender (Male)</b>                      | 90%                            | 94.4%                             |
| <b>Body weight (kg)</b>                   | 68.8                           | 69.4                              |
| <b>Alcoholic (Yes)</b>                    | 0                              | 0                                 |
| <b>Hepatitis B positive</b>               | 90%                            | 83.3%                             |
| <b>Hepatitis C positive</b>               | 10%                            | 11.1%                             |
| <b>HCC</b>                                | 100%                           | 94.4%                             |
| <b>Fatty change</b>                       |                                |                                   |
| No (0%)                                   | 100%                           | 0                                 |
| Mild (<10%)                               | 0                              | 55.56%                            |
| Moderate (10-30%)                         | 0                              | 22.22%                            |
| Severe (>30%)                             | 0                              | 22.22%                            |
| <b>Cirrhosis</b>                          | 90%                            | 88.9%                             |
| <b>Living donor</b>                       | 100%                           | 83.3%                             |
| <b>Child-pugh score</b>                   | 7                              | 7.33                              |
| <b>Milan criteria (within criteria)</b>   | 70%                            | 61.1%                             |
| <b>UCSF criteria (within criteria)</b>    | 70%                            | 77.78%                            |
| <b>Graft weight (gm)</b>                  | 600                            | 1126                              |
| <b>Graft weight to Recipient ESLV (%)</b> | 48.6                           | 90.7                              |
| <b>Cold ischemia time (min)</b>           | 107                            | 326                               |
| <b>SGOT</b>                               | 514.9                          | 830.6                             |
| <b>SGPT</b>                               | 455.2                          | 441.4                             |
| <b>Total bilirubin</b>                    | 66.3                           | 68.3                              |

ESLV: Estimated Standard Liver Volume
